# Supplementary material
Source: ML conference proceedings conference paper supplement (https://proceedings.neurips.cc/paper_files/paper/2012/hash/642e92efb79421734881b53e1e1b18b6-Abstract.html)
Supplement: Supplementary file 1 [file 642e92efb79421734881b53e1e1b18b6-Supplemental.zip]

# Supplementary material

## 1 Task hierarchies

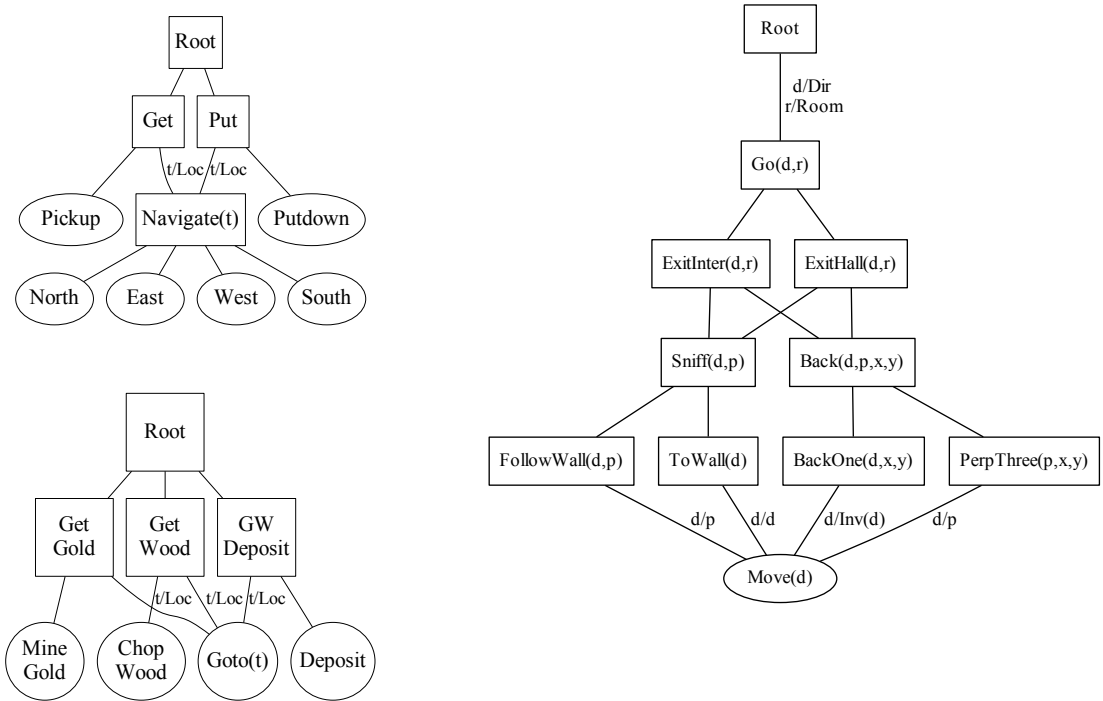

Figure 1: Task Hierarchies for Taxi-World (top-left), Resource-collection (bottom-left) and Hallway (right). Note that in subtasks Sniff and Back of Hallway, parameter  $p$  is perpendicular to  $r$ ,  $(x, y)$  is the location of agent when Back is called.
