# Supplementary material
Source: ML conference proceedings conference paper supplement (https://proceedings.neurips.cc/paper_files/paper/2012/hash/642e92efb79421734881b53e1e1b18b6-Abstract.html)
Supplement: Supplementary file 2 [file 642e92efb79421734881b53e1e1b18b6-Supplemental.zip]

Archive with 1 entries (1 files):
- supplementary/Paper 48/supplementary.pdf
